# Supplementary material for: LncRNA XIST sponges miR-199a-3p to modulate the Sp1/LRRK2 signal pathway to accelerate Parkinson’s disease progression
Source: PubMed Central journal article supplement (PMC7906184; doi:10.18632/aging.202378), 2021-01-20
Supplement: aging-13-202378-s001.pdf [file aging-13-202378-s001.pdf]

**SUPPLEMENTARY FIGURES**

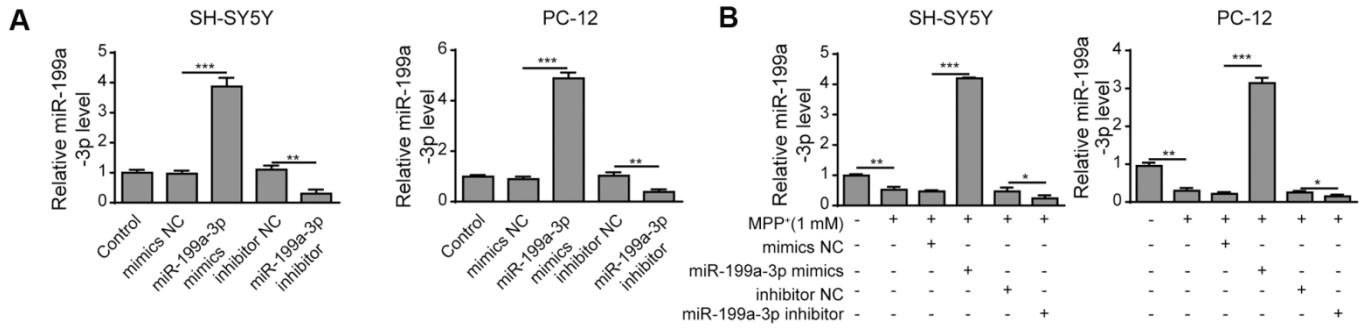

**Supplementary Figure 1.** (A) SH-SY5Y and PC-12 cells were transfected with miR-199a-3p mimics or the miR-199a-3p inhibitor. qPCR was conducted to determine the transfection efficiency. (B) SH-SY5Y and PC-12 cells were treated with 1 mM MPP<sup>+</sup> and transfected with the miR-199a-3p mimics, miR-199a-3p inhibitor, mimics NC or inhibitor NC. The relative expression of miR-199a-3p was determined by qPCR analysis.

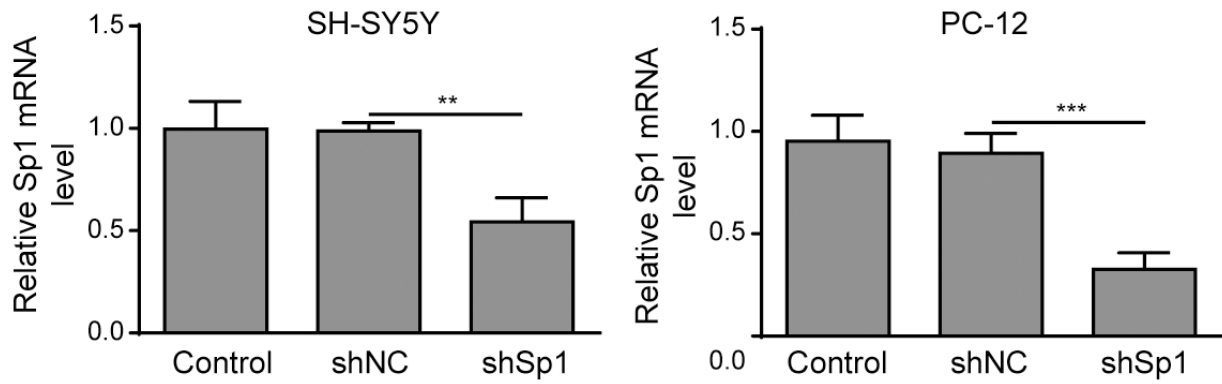

**Supplementary Figure 2.** SH-SY5Y and PC-12 cells were transfected with shNC or shSp1, and transfection efficiency was determined by qPCR.

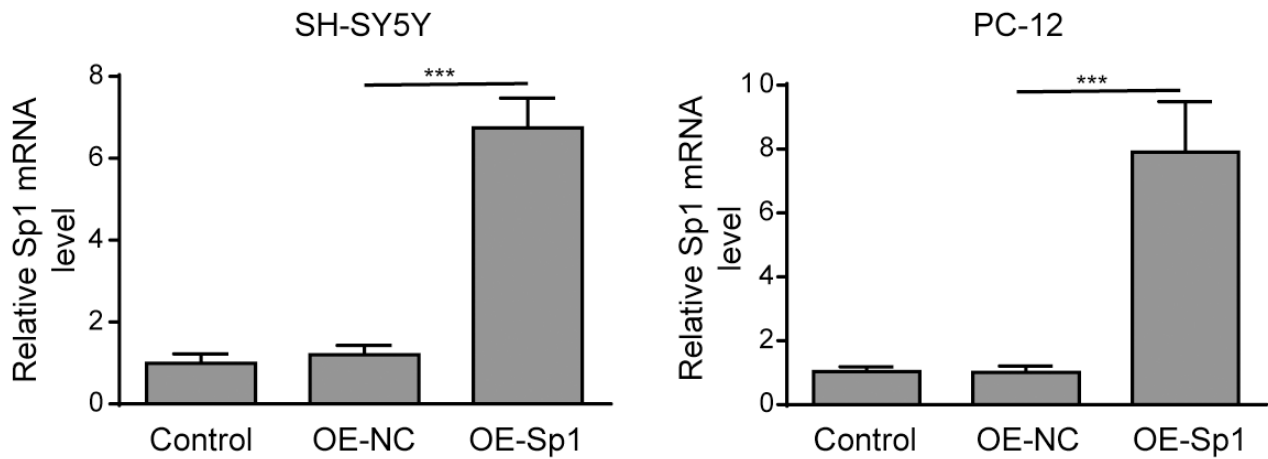

Supplementary Figure 3. SH-SY5Y and PC-12 cells were transfected with OE-NC or OE-Sp1, and transfection efficiency was determined by qPCR. OE: Overexpression.

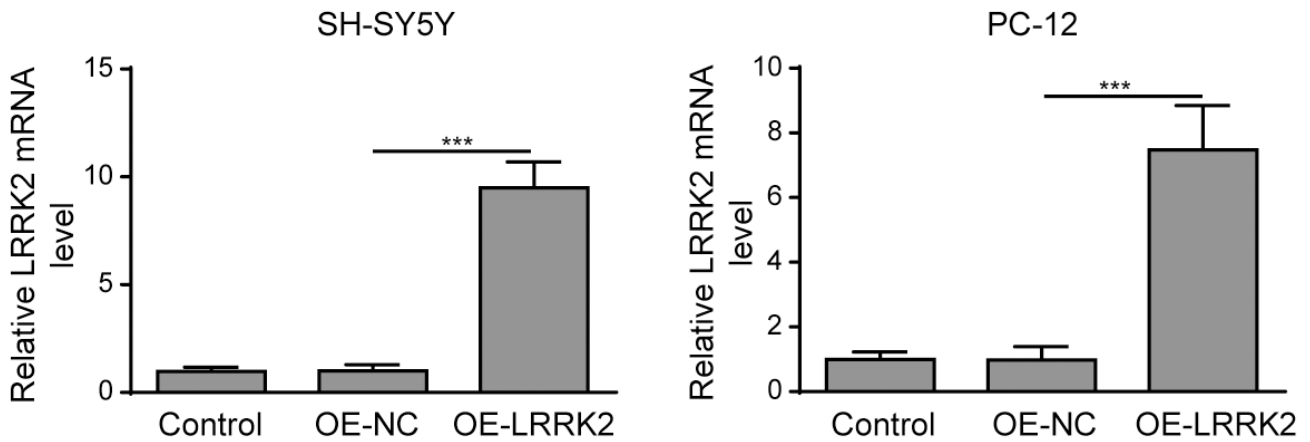

Supplementary Figure 4. SH-SY5Y and PC-12 cells were transfected with OE-NC or OE-LRRK2, and the transfection efficiency was measured by qPCR. OE: Overexpression.
